# Supplementary material for: In situ production and secretion of proteins endow therapeutic benefit against psoriasiform dermatitis and melanoma
Source: PubMed Central journal article supplement — Proc Natl Acad Sci U S A. 2023 Dec 18;120(52):e2313009120. doi: 10.1073/pnas.2313009120 (PMC10756300; doi:10.1073/pnas.2313009120), 2023-12-18
Supplement: pnas.2313009120.sapp.pdf [file pnas.2313009120.sapp.pdf]

## Supporting Information for

### *In situ* production and secretion of proteins endow therapeutic benefit against psoriasiform dermatitis and melanoma

Qiang Cheng,<sup>1-4 †</sup> Lukas Farbiak,<sup>1-4 †</sup> Amogh Vaidya,<sup>1-4</sup> Erick Guerrero,<sup>1-4</sup> Eunice E. Lee,<sup>4,5</sup> Elysha K. Rose,<sup>4,5</sup> Xu Wang,<sup>1-4</sup> Joshua Robinson,<sup>1-4</sup> Sang M. Lee,<sup>1-4</sup> Tuo Wei,<sup>1-4</sup> William E. Miller,<sup>1-4</sup> Ester Alvarez Benedicto,<sup>1-4</sup> Xizhen Lian,<sup>1-4</sup> Richard C. Wang,<sup>4,5</sup> and Daniel J. Siegwart<sup>1-4 \*</sup>

1 Department of Biomedical Engineering

2 Department of Biochemistry

3 Program in Genetic Drug Engineering

4 Simmons Comprehensive Cancer Center

5 Department of Dermatology

Email: [daniel.siegwart@utsouthwestern.edu](mailto:daniel.siegwart@utsouthwestern.edu)

**This PDF file includes:**

Figures S1 to S6

Tables S1 to S3



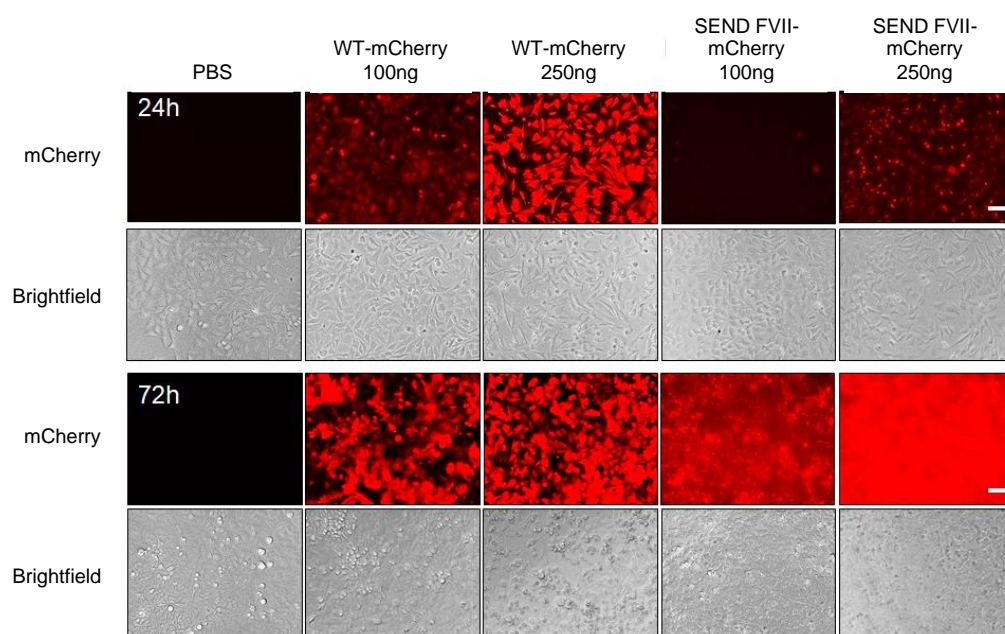

**Fig. S3.** The FVII SP drives effective mCherry secretion confirmed in HeLa cells following mRNA delivery. Obvious mCherry signal was observed in the medium at day 3 treated with FVII-mCherry mRNA formulation. HeLa cells in 96-well plate were treated by mRNA LNPs with different doses and imaged with a Keyence microscope (exposure time, 1/6s for 24h and 1/15s for 72h).

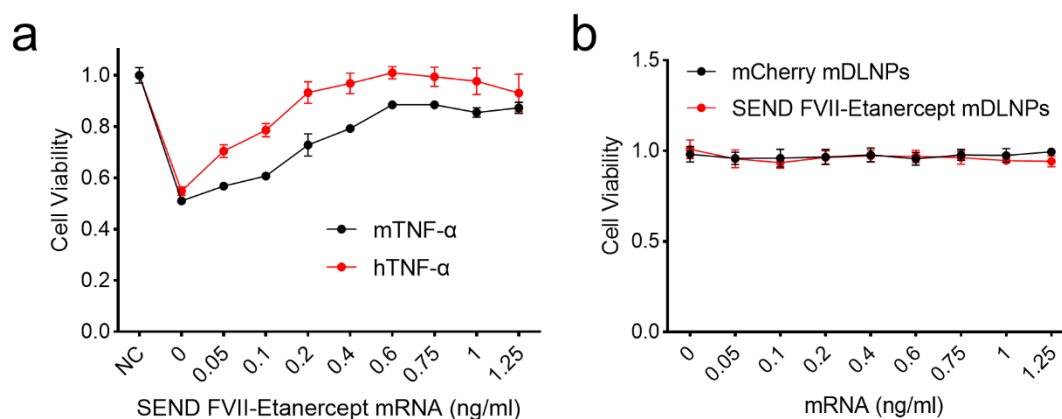

**Fig. S4.** The FVII-etanercept mRNA formulation rescued the cytotoxicity induced by TNF- $\alpha$ . (A), Dose-dependent rescue with LNP delivery. L929 cells were pretreated by FVII-etanercept mRNA LNPs with mRNA doses of 0 – 1.25 ng/mL. After two days, cells were challenged by TNF- $\alpha$  with dose of 0.02 ng/mL and fixed Actinomycin of 1ug/mL. After another 24h, cell viability was detected. (B), No significant cytotoxicity was observed by mRNA formulation only.

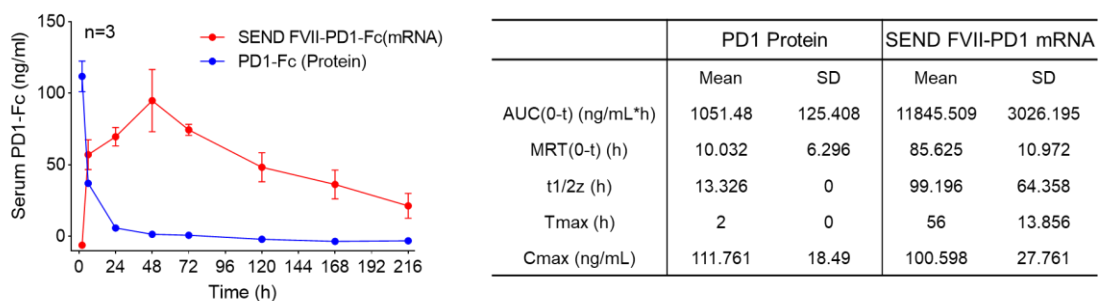

**Fig. S5.** IV administration of FVII-PD1 mRNA LNPs enabled >11-fold increase in total area under the curve (AUC), >7-fold enhancement in half-life ( $t_{1/2}$ ), and a 28-fold extension of mean residence time (MRT) as compared to IV administration of PD1-Fc protein. For pharmacokinetic comparison between PD1 protein and mRNA LNPs after single dosing, mice were I.V. injected with dose of 0.5 mg/kg mRNA LNP formulation or proteins. Serum was collected at different time points and PD1 was quantified by ELISA kit.

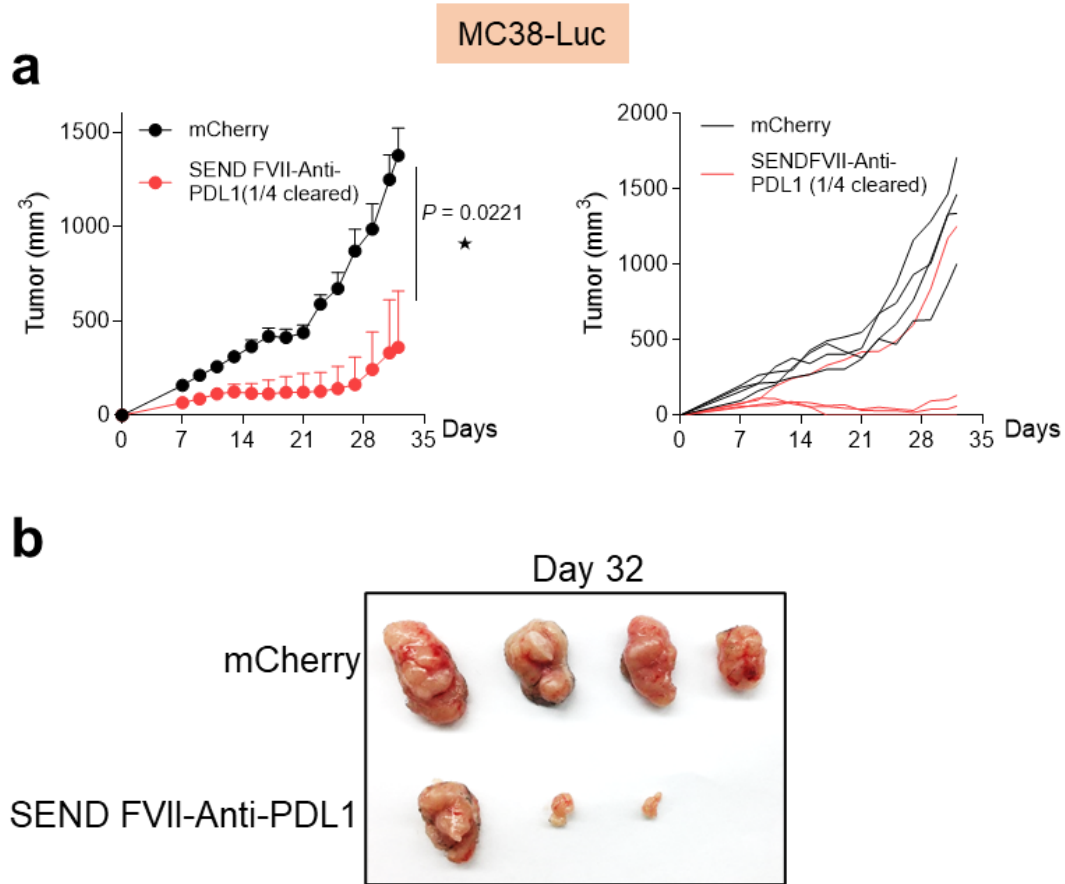

**Fig S6.** Tumor immunotherapy by FVII-Anti-PDL1 mRNA LNPs. (A), Tumor growth of MC38-Luc model during treatments by mRNA formulations. (B), Tumor images at the day 32 (1/4 cleared). (\* $P < 0.05$ )

**Table S1.** Design of signal peptide-modified mCherry sequences.

| Sample ID    | AA Sequence (SP + mCherry)         | SP Sources                | Predicted SP (?) |
|--------------|------------------------------------|---------------------------|------------------|
| WT-mCherry   | MVSKG...                           | N/A                       | No               |
| NC-mCherry   | MEDAKNIKKGPAPFYPLEDGMVSKG...       | GenBank: CAB91857.1       | No               |
| Alb-mCherry  | MKWVTFISLLFLFSSAYSMVSKG...         | GenBank: AAA98797.1       | Yes              |
| ApoB-mCherry | MDPPRPALLALLALPALLLLLAGARAMVSKG... | NCBI Ref.:<br>NP_000375.3 | Yes              |
| gLuc-mCherry | MGVKVLFALICIAVAEAMVSKG...          | GenBank: BAR71165.1       | Yes              |
| FVII-mCherry | MVSQALRLLCLLLGLQGCLAMVSKG...       | GenBank: AAP33841.1       | Yes              |

| Sample ID      | AA Sequence (SP + hEPO)                                                                                                                                                                                     |
|----------------|-------------------------------------------------------------------------------------------------------------------------------------------------------------------------------------------------------------|
| WT-hEPO        | MGVHECPAWLWLLLSLLSLPLGLPVLGAPPRLICDSRVLERYLLEAKEAENITTGCAEHCSLNENITVPD<br>TKVNFYAWKRMEVGQQAVEVWQGLALLSEAVLRGQALLVNSSQPWEPLQLHVDKAVSGLRSLTTLLR<br>ALGAQKEAISPPDAASAAPLRTITADTFRKLFRVYSNFLRGKCLKLYTGEACRTGDR* |
| NSP-hEPO       | MAPPRLICDSRVLERYLLEAKEAENITTGCAEHCSLNENITVPDTKVNFYAWKRMEVGQQAVEVWQGL<br>ALLSEAVLRGQALLVNSSQPWEPLQLHVDKAVSGLRSLTTLLRALGAQKEAISPPDAASAAPLRTITADT<br>FRKLFRVYSNFLRGKCLKLYTGEACRTGDR*                           |
| SEND FVII-hEPO | MVSQALRLLCLLGLQGCLAAPPRLICDSRVLERYLLEAKEAENITTGCAEHCSLNENITVPDTKVNFYA<br>WKRMEVGQQAVEVWQGLALLSEAVLRGQALLVNSSQPWEPLQLHVDKAVSGLRSLTTLLRALGAQKE<br>AISPPDAASAAPLRTITADTFRKLFRVYSNFLRGKCLKLYTGEACRTGDR*         |

**Table S2.** Design of signal peptide-modified hEPO sequences.

| Sample ID                | AA Sequence (SP + Therapeutic)                                                                                                                                                                                                                                                                                                                                                                                                                                                                                                                                                   |
|--------------------------|----------------------------------------------------------------------------------------------------------------------------------------------------------------------------------------------------------------------------------------------------------------------------------------------------------------------------------------------------------------------------------------------------------------------------------------------------------------------------------------------------------------------------------------------------------------------------------|
| SEND FVII-<br>etanercept | MGVHECPAWLWLLLSLLSLPLGLPVLGLPAQVAFTPYAPEPGSTCRLREYYDQTAQMCCSKCSPGQH<br>AKVFCTKTSDTVCDSCEDSTYTQLWNWVPECLSCGSRCSSDQVETQACTREQNRICRCPGWYCAL<br>KQEGCRLCAPLRKCRPGFGVARPGTETSDVVCKPCAPGTFSNTTSSTDICRPHQICNVVAIPGNASMD<br>AVCTSTSPTRSMAPGAVHLPQPVSTRSQHTQPTPEPSTAPSTSFLPMGPSPPAEGSTGDEPKSCDKT<br>HTCPPCPAPELLGGPSVFLFPPKPKDTLMISRTPEVTCVVVDVSHEDPEVKFNWYVDGVEVHNAKTKP<br>REEQYNSTYRVVSVLTVLHQDWLNGKEYKCKVSNKALPAPIEKTISKAKGQPREPQVYTLPPSREEMTK<br>NQVSLTCLVKGFYPSDIAVEWESNGQPENNYKTTPPVLDSDGSFFLYSKLTVDKSRWQQGNVFCSSV<br>MHEALHNHYTQKSLSLSPGK                                          |
| SEND FVII-anti-<br>PDL1  | MGVHECPAWLWLLLSLLSLPLGLPVLGMVSQALRLLCLLLGLQGCLAEVQLVESGGGLVQPGGSLRLS<br>CAASGFTFSDSWIHWVRQAPGKGLEWVAVISPYGGSTYYADSVKGRFTISADTSKNTAYLQMNSLRA<br>EDTAVYYCARRHWPGGFDYWGQGTLLTVSGGGGSGGGGSGGGGSGGGGSDIQMTQSPSSLSASV<br>GDRVITICRASQDVSTAVAWYQQKPGKAPKLLIYSASFLYSGVPSRFSGSGSGTDFTLTISLQPEDFA<br>TYYCQQYLYHPATFGQGTKVEIKEPKSCDKTHTCPPCPAPELLGGPSVFLFPPKPKDTLMISRTPEVTC<br>VVVDVSHEDPEVKFNWYVDGVEVHNAKTKPREEQYNSTYRVVSVLTVLHQDWLNGKEYKCKVSNKAL<br>PAPIEKTISKAKGQPREPQVYTLPPSRDELTKNQVSLTCLVKGFYPSDIAVEWESNGQPENNYKTTPPV<br>LDSDGSFFLYSKLTVDKSRWQQGNVFCSSVMHEALHNHYTQKSLSLSPGKGGGSHHHHHH |

**Table S3.** Design of signal peptide-modified therapeutics (etanercept and anti-PDL1)
